# Supplementary material
Source: HighWire-hosted journal article supplement (http://www.jrheum.org/highwire/filestream/29772/field_highwire_adjunct_files/0/150712DataSuppl.pdf)
Supplement: 150712DataSuppl.pdf [file 150712DataSuppl.pdf]

**Supplementary Table 1. Patient disposition through week 256**

|                                                                                   | Placebo +<br>MTX | Golimumab<br>100 mg +<br>Placebo | Golimumab + MTX |            |           |            |
|-----------------------------------------------------------------------------------|------------------|----------------------------------|-----------------|------------|-----------|------------|
|                                                                                   |                  |                                  | 50 mg           | 100 mg     | Combined  | Total      |
| Patients randomized, n                                                            | 133              | 133                              | 89              | 89         | 178       | 444        |
| Patients treated, n                                                               | 133              | 133                              | 89              | 89         | 178       | 444        |
| Treatment received                                                                |                  |                                  |                 |            |           |            |
| Placebo + MTX                                                                     | 133 (100.0)      | 0                                | 0               | 0          | 0         | 133 (30.0) |
| Placebo + MTX → golimumab 50 mg + MTX<br>(early escaped at week 16)               | 42 (31.6)        | 0                                | 0               | 0          | 0         | 42 (9.5)   |
| Dose escalated to 100 mg + MTX (LTE) <sup>a</sup>                                 | 18 (13.5)        | 0                                | 0               | 0          | 0         | 18 (4.1)   |
| Dose decreased to 50 mg + MTX (LTE) <sup>b</sup>                                  | 3 (2.3)          | 0                                | 0               | 0          | 0         | 3 (0.7)    |
| Placebo + MTX → golimumab 50 mg + MTX<br>(crossover at week 24)                   | 82 (61.7)        | 0                                | 0               | 0          | 0         | 82 (18.5)  |
| Dose escalated to 100 mg + MTX (LTE) <sup>a</sup>                                 | 36 (27.1)        | 0                                | 0               | 0          | 0         | 36 (8.1)   |
| Dose decreased to 50 mg + MTX (LTE) <sup>b</sup>                                  | 13 (9.8)         | 0                                | 0               | 0          | 0         | 13 (2.9)   |
| Golimumab 100 mg + Placebo                                                        | 0                | 133 (100.0)                      | 0               | 0          | 0         | 133 (30.0) |
| Golimumab 100 mg + Placebo → golimumab 100<br>mg + MTX (early escaped at week 16) | 0                | 36 (27.1)                        | 0               | 0          | 0         | 36 (8.1)   |
| Dose decreased to 50 mg + MTX (LTE) <sup>b</sup>                                  | 0                | 4 (3.0)                          | 0               | 0          | 0         | 4 (0.9)    |
| Golimumab 100mg + Placebo did not early escape<br>at week 16                      | 0                | 97 (72.9)                        | 0               | 0          | 0         | 97 (21.8)  |
| Dose decreased to 50 mg + Placebo (LTE) <sup>b</sup>                              | 0                | 17 (12.8)                        | 0               | 0          | 0         | 17 (3.8)   |
| Golimumab 50 mg + MTX                                                             | 0                | 0                                | 89 (100.0)      | 0          | 89 (50.0) | 89 (20.0)  |
| Golimumab 50 mg + MTX did not early escape at<br>week 16                          | 0                | 0                                | 74 (83.1)       | 0          | 74 (41.6) | 74 (16.7)  |
| Dose escalated to 100 mg + MTX (LTE) <sup>a</sup>                                 | 0                | 0                                | 33 (37.1)       | 0          | 33 (18.5) | 33 (7.4)   |
| Dose decreased to 50 mg + MTX (LTE) <sup>b</sup>                                  | 0                | 0                                | 8 (9.0)         | 0          | 8 (4.5)   | 8 (1.8)    |
| Golimumab 50 mg + MTX → 100 mg + MTX<br>(early escaped at week 16)                | 0                | 0                                | 15 (16.9)       | 0          | 15 (8.4)  | 15 (3.4)   |
| Dose decreased to 50 mg + MTX (LTE) <sup>b</sup>                                  | 0                | 0                                | 3 (3.4)         | 0          | 3 (1.7)   | 3 (0.7)    |
| Golimumab 100 mg + MTX                                                            | 0                | 0                                | 0               | 89 (100.0) | 89 (50.0) | 89 (20.0)  |
| Dose decreased to 50 mg + MTX (LTE) <sup>b</sup>                                  | 0                | 0                                | 0               | 13 (14.6)  | 13 (7.3)  | 13 (2.9)   |

Data presented as n (%). MTX, methotrexate; LTE, long-term extension

<sup>a</sup> Per protocol, after the week 52 database lock, the golimumab dose could be increased from 50 mg to 100 mg at the discretion of the investigator.

<sup>b</sup> Based on protocol amendment 3, the golimumab dose could be decreased from 100 mg to 50 mg at the discretion of the investigator.

| <b>Supplementary Table 2.</b> Annual incidence per 100 patient-years of serious infections, total malignancies, lymphoma, and deaths. |                    |                     |                                  |                             |                   |
|---------------------------------------------------------------------------------------------------------------------------------------|--------------------|---------------------|----------------------------------|-----------------------------|-------------------|
|                                                                                                                                       | Placebo+MTX        | 50 mg + MTX<br>only | 50 and 100mg +<br>Placebo or MTX | Golimumab 100<br>mg +/- MTX | Total Golimumab   |
| Patients treated with golimumab, n                                                                                                    | 134                | 105                 | 145                              | 184                         | 434               |
| <b>Serious infections</b>                                                                                                             |                    |                     |                                  |                             |                   |
| <u>Year 1</u>                                                                                                                         |                    |                     |                                  |                             |                   |
| Patients treated during year 1, n                                                                                                     | 134                | 105                 | 145                              | 184                         | 434               |
| Total patient-years of follow-up                                                                                                      | 55                 | 76                  | 122                              | 174                         | 372               |
| Observed number of events                                                                                                             | 1                  | 2                   | 3                                | 18                          | 23                |
| Incidence/100 patient-years (95% CI)                                                                                                  | 1.82 (0.05, 10.12) | 2.65 (0.32, 9.57)   | 2.46 (0.51, 7.18)                | 10.33 (6.12, 16.32)         | 6.18 (3.92, 9.28) |
| <u>Year 2</u>                                                                                                                         |                    |                     |                                  |                             |                   |
| Patients treated during year 2, n                                                                                                     | 0                  | 98                  | 145                              | 158                         | 401               |
| Total patient-years of follow-up                                                                                                      |                    | 88                  | 145                              | 145                         | 378               |
| Observed number of events                                                                                                             |                    | 3                   | 4                                | 4                           | 11                |
| Incidence/100 patient-years (95% CI)                                                                                                  |                    | 3.40 (0.70, 9.95)   | 2.77 (0.75, 7.08)                | 2.75 (0.75, 7.05)           | 2.91 (1.45, 5.21) |
| <u>Year 3</u>                                                                                                                         |                    |                     |                                  |                             |                   |
| Patients treated during year 3, n                                                                                                     | 0                  | 79                  | 144                              | 137                         | 360               |
| Total patient-years of follow-up                                                                                                      |                    | 77                  | 142                              | 133                         | 353               |
| Observed number of events                                                                                                             |                    | 1                   | 2                                | 3                           | 6                 |
| Incidence/100 patient-years (95% CI)                                                                                                  |                    | 1.29 (0.03, 7.21)   | 1.41 (0.17, 5.09)                | 2.25 (0.46, 6.58)           | 1.70 (0.62, 3.70) |
| <u>Year 4</u>                                                                                                                         |                    |                     |                                  |                             |                   |
| Patients treated during year 4, n                                                                                                     | 0                  | 76                  | 138                              | 130                         | 344               |
| Total patient-years of follow-up                                                                                                      |                    | 74                  | 137                              | 127                         | 338               |
| Observed number of events                                                                                                             |                    | 1                   | 8                                | 2                           | 11                |
| Incidence/100 patient-years (95% CI)                                                                                                  |                    | 1.36 (0.03, 7.56)   | 5.83 (2.52, 11.49)               | 1.58 (0.19, 5.69)           | 3.26 (1.63, 5.83) |
| <u>Year 5</u>                                                                                                                         |                    |                     |                                  |                             |                   |
| Patients treated during year 5, n                                                                                                     | 0                  | 71                  | 135                              | 123                         | 329               |
| Total patient-years of follow-up                                                                                                      |                    | 76                  | 148                              | 135                         | 359               |
| Observed number of events                                                                                                             |                    | 3                   | 5                                | 3                           | 11                |
| Incidence/100 patient-years (95% CI)                                                                                                  |                    | 3.93 (0.81, 11.49)  | 3.37 (1.10, 7.88)                | 2.23 (0.46, 6.52)           | 3.06 (1.53, 5.48) |
| <b>Total Malignancies</b>                                                                                                             |                    |                     |                                  |                             |                   |
| <u>Year 1</u>                                                                                                                         |                    |                     |                                  |                             |                   |
| Patients treated during year 1, n                                                                                                     | 134                | 105                 | 145                              | 184                         | 434               |
| Total patient-years of follow-up                                                                                                      | 55                 | 75                  | 122                              | 172                         | 369               |
| Observed number of events                                                                                                             | 2                  | 2                   | 1                                | 5                           | 8                 |
| Incidence/100 patient-years (95% CI)                                                                                                  | 3.65 (0.44, 13.18) | 2.67 (0.32, 9.63)   | 0.82 (0.02, 4.57)                | 2.90 (0.94, 6.77)           | 2.17 (0.94, 4.27) |
| <u>Year 2</u>                                                                                                                         |                    |                     |                                  |                             |                   |
| Patients treated during year 2, n                                                                                                     | 0                  | 96                  | 144                              | 155                         | 395               |
| Total patient-years of follow-up                                                                                                      |                    | 86                  | 143                              | 142                         | 372               |

| <b>Supplementary Table 2.</b> Annual incidence per 100 patient-years of serious infections, total malignancies, lymphoma, and deaths. |                   |                     |                                  |                             |                   |
|---------------------------------------------------------------------------------------------------------------------------------------|-------------------|---------------------|----------------------------------|-----------------------------|-------------------|
|                                                                                                                                       | Placebo+MTX       | 50 mg + MTX<br>only | 50 and 100mg +<br>Placebo or MTX | Golimumab 100<br>mg +/- MTX | Total Golimumab   |
| Observed number of events                                                                                                             |                   | 2                   | 1                                | 3                           | 6                 |
| Incidence/100 patient-years (95% CI)                                                                                                  |                   | 2.31 (0.28, 8.35)   | 0.70 (0.02, 3.89)                | 2.11 (0.44, 6.18)           | 1.62 (0.59, 3.52) |
| <u><b>Year 3</b></u>                                                                                                                  |                   |                     |                                  |                             |                   |
| Patients treated during year 3, n                                                                                                     | 0                 | 79                  | 142                              | 133                         | 354               |
| Total patient-years of follow-up                                                                                                      |                   | 77                  | 139                              | 129                         | 346               |
| Observed number of events                                                                                                             |                   | 0                   | 2                                | 0                           | 2                 |
| Incidence/100 patient-years (95% CI)                                                                                                  |                   | 0.00 (0.00, 3.87)   | 1.43 (0.17, 5.18)                | 0.00 (0.00, 2.32)           | 0.58 (0.07, 2.09) |
| <u><b>Year 4</b></u>                                                                                                                  |                   |                     |                                  |                             |                   |
| Patients treated during year 4, n                                                                                                     | 0                 | 76                  | 135                              | 126                         | 337               |
| Total patient-years of follow-up                                                                                                      |                   | 74                  | 134                              | 123                         | 331               |
| Observed number of events                                                                                                             |                   | 0                   | 0                                | 2                           | 2                 |
| Incidence/100 patient-years (95% CI)                                                                                                  |                   | 0.00 (0.00, 4.06)   | 0.00 (0.00, 2.23)                | 1.63 (0.20, 5.88)           | 0.60 (0.07, 2.18) |
| <u><b>Year 5</b></u>                                                                                                                  |                   |                     |                                  |                             |                   |
| Patients treated during year 5, n                                                                                                     | 0                 | 71                  | 132                              | 120                         | 323               |
| Total patient-years of follow-up                                                                                                      |                   | 75                  | 144                              | 130                         | 349               |
| Observed number of events                                                                                                             |                   | 2                   | 2                                | 5                           | 9                 |
| Incidence/100 patient-years (95% CI)                                                                                                  |                   | 2.67 (0.32, 9.64)   | 1.39 (0.17, 5.01)                | 3.85 (1.25, 8.97)           | 2.58 (1.18, 4.89) |
| <b>Lymphoma</b>                                                                                                                       |                   |                     |                                  |                             |                   |
| <u><b>Year 1</b></u>                                                                                                                  |                   |                     |                                  |                             |                   |
| Patients treated during year 1, n                                                                                                     | 134               | 105                 | 145                              | 184                         | 434               |
| Total patient-years of follow-up                                                                                                      | 55                | 76                  | 122                              | 174                         | 372               |
| Observed number of events                                                                                                             | 0                 | 0                   | 0                                | 0                           | 0                 |
| Incidence/100 patient-years (95% CI)                                                                                                  | 0.00 (0.00, 5.44) | 0.00 (0.00, 3.97)   | 0.00 (0.00, 2.45)                | 0.00 (0.00, 1.72)           | 0.00 (0.00, 0.81) |
| <u><b>Year 2</b></u>                                                                                                                  |                   |                     |                                  |                             |                   |
| Patients treated during year 2, n                                                                                                     | 0                 | 98                  | 145                              | 158                         | 401               |
| Total patient-years of follow-up                                                                                                      |                   | 88                  | 145                              | 145                         | 378               |
| Observed number of events                                                                                                             |                   | 0                   | 0                                | 1                           | 1                 |
| Incidence/100 patient-years (95% CI)                                                                                                  |                   | 0.00 (0.00, 3.40)   | 0.00 (0.00, 2.07)                | 0.69 (0.02, 3.84)           | 0.26 (0.01, 1.47) |
| <u><b>Year 3</b></u>                                                                                                                  |                   |                     |                                  |                             |                   |
| Patients treated during year 3, n                                                                                                     | 0                 | 79                  | 144                              | 137                         | 360               |
| Total patient-years of follow-up                                                                                                      |                   | 77                  | 142                              | 133                         | 353               |
| Observed number of events                                                                                                             |                   | 0                   | 0                                | 0                           | 0                 |
| Incidence/100 patient-years (95% CI)                                                                                                  |                   | 0.00 (0.00, 3.87)   | 0.00 (0.00, 2.11)                | 0.00 (0.00, 2.25)           | 0.00 (0.00, 0.85) |
| <u><b>Year 4</b></u>                                                                                                                  |                   |                     |                                  |                             |                   |
| Patients treated during year 4, n                                                                                                     | 0                 | 76                  | 138                              | 130                         | 344               |
| Total patient-years of follow-up                                                                                                      |                   | 74                  | 137                              | 127                         | 338               |

| <b>Supplementary Table 2.</b> Annual incidence per 100 patient-years of serious infections, total malignancies, lymphoma, and deaths. |                   |                     |                                  |                             |                   |
|---------------------------------------------------------------------------------------------------------------------------------------|-------------------|---------------------|----------------------------------|-----------------------------|-------------------|
|                                                                                                                                       | Placebo+MTX       | 50 mg + MTX<br>only | 50 and 100mg +<br>Placebo or MTX | Golimumab 100<br>mg +/- MTX | Total Golimumab   |
| Observed number of events                                                                                                             |                   | 0                   | 0                                | 1                           | 1                 |
| Incidence/100 patient-years (95% CI)                                                                                                  |                   | 0.00 (0.00, 4.06)   | 0.00 (0.00, 2.18)                | 0.79 (0.02, 4.40)           | 0.30 (0.01, 1.65) |
| <b>Year 5</b>                                                                                                                         |                   |                     |                                  |                             |                   |
| Patients treated during year 5, n                                                                                                     | 0                 | 71                  | 135                              | 123                         | 329               |
| Total patient-years of follow-up                                                                                                      |                   | 76                  | 148                              | 135                         | 359               |
| Observed number of events                                                                                                             |                   | 0                   | 0                                | 0                           | 0                 |
| Incidence/100 patient-years (95% CI)                                                                                                  |                   | 0.00 (0.00, 3.92)   | 0.00 (0.00, 2.02)                | 0.00 (0.00, 2.23)           | 0.00 (0.00, 0.83) |
| <b>Deaths</b>                                                                                                                         |                   |                     |                                  |                             |                   |
| <b>Year 1</b>                                                                                                                         |                   |                     |                                  |                             |                   |
| Patients treated during year 1, n                                                                                                     | 134               | 105                 | 145                              | 184                         | 434               |
| Total patient-years of follow-up                                                                                                      | 55                | 76                  | 122                              | 174                         | 372               |
| Observed number of events                                                                                                             | 0                 | 0                   | 0                                | 2                           | 2                 |
| Incidence/100 patient-years (95% CI)                                                                                                  | 0.00 (0.00, 5.44) | 0.00 (0.00, 3.97)   | 0.00 (0.00, 2.45)                | 1.15 (0.14, 4.15)           | 0.54 (0.07, 1.94) |
| <b>Year 2</b>                                                                                                                         |                   |                     |                                  |                             |                   |
| Patients treated during year 2, n                                                                                                     | 0                 | 98                  | 145                              | 158                         | 401               |
| Total patient-years of follow-up                                                                                                      |                   | 88                  | 145                              | 145                         | 378               |
| Observed number of events                                                                                                             |                   | 0                   | 0                                | 2                           | 2                 |
| Incidence/100 patient-years (95% CI)                                                                                                  |                   | 0.00 (0.00, 3.40)   | 0.00 (0.00, 2.07)                | 1.38 (0.17, 4.97)           | 0.53 (0.06, 1.91) |
| <b>Year 3</b>                                                                                                                         |                   |                     |                                  |                             |                   |
| Patients treated during year 3, n                                                                                                     | 0                 | 79                  | 144                              | 137                         | 360               |
| Total patient-years of follow-up                                                                                                      |                   | 77                  | 142                              | 133                         | 353               |
| Observed number of events                                                                                                             |                   | 0                   | 0                                | 0                           | 0                 |
| Incidence/100 patient-years (95% CI)                                                                                                  |                   | 0.00 (0.00, 3.87)   | 0.00 (0.00, 2.11)                | 0.00 (0.00, 2.25)           | 0.00 (0.00, 0.85) |
| <b>Year 4</b>                                                                                                                         |                   |                     |                                  |                             |                   |
| Patients treated during year 4, n                                                                                                     | 0                 | 76                  | 138                              | 130                         | 344               |
| Total patient-years of follow-up                                                                                                      |                   | 74                  | 137                              | 127                         | 338               |
| Observed number of events                                                                                                             |                   | 0                   | 1                                | 0                           | 1                 |
| Incidence/100 patient-years (95% CI)                                                                                                  |                   | 0.00 (0.00, 4.06)   | 0.73 (0.02, 4.06)                | 0.00 (0.00, 2.36)           | 0.30 (0.01, 1.65) |
| <b>Year 5</b>                                                                                                                         |                   |                     |                                  |                             |                   |
| Patients treated during year 5, n                                                                                                     | 0                 | 71                  | 135                              | 123                         | 329               |
| Total patient-years of follow-up                                                                                                      |                   | 76                  | 148                              | 135                         | 359               |
| Observed number of events                                                                                                             |                   | 0                   | 0                                | 1                           | 1                 |
| Incidence/100 patient-years (95% CI)                                                                                                  |                   | 0.00 (0.00, 3.92)   | 0.00 (0.00, 2.02)                | 0.74 (0.02, 4.14)           | 0.28 (0.01, 1.55) |
| CI, confidence interval; MTX, methotrexate                                                                                            |                   |                     |                                  |                             |                   |

| Supplementary Table 3. Clinical efficacy and patient-reported outcomes at week 256 using observed data.                                                                                                                                                                                                                                                                                                                                                                                                                            |                  |             |                 |             |             |               |
|------------------------------------------------------------------------------------------------------------------------------------------------------------------------------------------------------------------------------------------------------------------------------------------------------------------------------------------------------------------------------------------------------------------------------------------------------------------------------------------------------------------------------------|------------------|-------------|-----------------|-------------|-------------|---------------|
|                                                                                                                                                                                                                                                                                                                                                                                                                                                                                                                                    | Golimumab 100 mg |             | Golimumab + MTX |             |             |               |
|                                                                                                                                                                                                                                                                                                                                                                                                                                                                                                                                    | Placebo + MTX    | + Placebo   | 50 mg           | 100 mg      | Combined    | Total         |
| Clinical efficacy                                                                                                                                                                                                                                                                                                                                                                                                                                                                                                                  |                  |             |                 |             |             |               |
| ACR20                                                                                                                                                                                                                                                                                                                                                                                                                                                                                                                              | 69 (75.8)        | 71 (76.3)   | 57 (77.0)       | 44 (74.6)   | 101 (75.9)  | 241 (76.0)    |
| ACR50                                                                                                                                                                                                                                                                                                                                                                                                                                                                                                                              | 43 (47.3)        | 48 (51.6)   | 40 (54.1)       | 28 (47.5)   | 68 (51.1)   | 159 (50.2)    |
| ACR70                                                                                                                                                                                                                                                                                                                                                                                                                                                                                                                              | 21 (23.1)        | 27 (29.0)   | 28 (37.8)       | 15 (25.4)   | 43 (32.3)   | 91 (28.7)     |
| DAS28-CRP response <sup>a</sup>                                                                                                                                                                                                                                                                                                                                                                                                                                                                                                    | 81 (90.0)        | 83 (90.2)   | 65 (89.0)       | 52 (88.1)   | 117 (88.6)  | 281 (89.5)    |
| DAS28-CRP remission <sup>b</sup>                                                                                                                                                                                                                                                                                                                                                                                                                                                                                                   | 38 (42.2)        | 41 (44.6)   | 35 (47.9)       | 27 (45.8)   | 62 (47.0)   | 141 (44.9)    |
| DAS28-CRP ≤3.2                                                                                                                                                                                                                                                                                                                                                                                                                                                                                                                     | 56 (62.2)        | 59 (64.1)   | 46 (63.0)       | 38 (63.3)   | 84 (63.2)   | 199 (63.2)    |
| SDAI ≤3.3                                                                                                                                                                                                                                                                                                                                                                                                                                                                                                                          | 25 (27.8)        | 21 (22.8)   | 20 (27.4)       | 17 (28.3)   | 37 (27.8)   | 83 (26.3)     |
| CDAI ≤2.8                                                                                                                                                                                                                                                                                                                                                                                                                                                                                                                          | 23 (25.3)        | 21 (22.6)   | 22 (29.7)       | 18 (29.5)   | 40 (29.6)   | 84 (26.3)     |
| Improvement from baseline<br>in HAQ-DI, mean ± SD                                                                                                                                                                                                                                                                                                                                                                                                                                                                                  | 0.44 ± 0.68      | 0.50 ± 0.63 | 0.61 ± 0.66     | 0.47 ± 0.55 | 0.55 ± 0.62 | 0.50 ± 0.64)\ |
| Patients with improvement<br>in HAQ-DI ≥0.25                                                                                                                                                                                                                                                                                                                                                                                                                                                                                       | 61 (67.0)        | 59 (63.4)   | 55 (74.3)       | 42 (71.2)   | 97 (72.9)   | 217 (68.5)    |
| Data presented as n (%) unless otherwise noted. <sup>a</sup> Good or moderate response as defined by the European League Against Rheumatism. <sup>b</sup> DAS28-CRP score <2.6. MTX, methotrexate; ACR20/50/70, ≥20%/50%/70% improvement in American College of Rheumatology criteria; DAS28-CRP, 28-joint count disease activity score using C-reactive protein; SDAI, simplified disease activity index; CDAI, clinical disease activity index; HAQ-DI, Health Assessment Questionnaire-Disability Index; SD, standard deviation |                  |             |                 |             |             |               |
